# Supplementary material for: Hypoglycemic activity in vitro and vivo of a water-soluble polysaccharide from Astragalus membranaceus
Source: Royal Society of Chemistry journal article supplement (doi:10.1039/d2fo02298b), 2022-01-01

**Hypoglycemic activity *in vitro* and *vivo* of a water-soluble polysaccharide from  
*Astragalus membranaceus***

Xiaoxia Chen<sup>a</sup>, Chun Chen<sup>a, b, c, d \*</sup>, and Xiong Fu<sup>a, b, c, d \*\*</sup>

<sup>a</sup> SCUT-Zhuhai Institute of Modern Industrial Innovation, School of Food Science and Engineering, South China University of Technology, 381 Wushan Road, Guangzhou 510640, China

<sup>b</sup> Guangzhou Institute of Modern Industrial Technology, Nansha, 511458, China

<sup>c</sup> Guangdong Province Key Laboratory for Green Processing of Natural Products and Product Safety, Guangzhou 510640, China

<sup>d</sup> Overseas Expertise Introduction Center for Discipline Innovation of Food Nutrition and Human Health (111 Center), Guangzhou 510640, China

Corresponding author

\*Chun Chen: [chenc@scut.edu.cn](mailto:chenc@scut.edu.cn)

\*\*Xiong Fu: [lxfu@scut.edu.cn](mailto:lxfu@scut.edu.cn)

**Table S1.** Pearson correlation analysis of oxidative stress and diabetes related symptoms.

|                                 |                  | SOD    |       | CAT    |       | MDA    |       | GSH    |       |
|---------------------------------|------------------|--------|-------|--------|-------|--------|-------|--------|-------|
|                                 |                  | r      | P     | r      | P     | r      | P     | r      | P     |
| Blood<br>glucose                | FBG              | -0.896 | 0.001 | -0.901 | 0.001 | 0.788  | 0.012 | -0.786 | 0.012 |
|                                 | GSP              | -0.885 | 0.002 | -0.899 | 0.001 | 0.571  | 0.108 | -0.862 | 0.003 |
|                                 | AUC-OGTT         | -0.946 | 0.000 | -0.956 | 0.000 | 0.727  | 0.026 | -0.927 | 0.000 |
|                                 | FINS             | -0.929 | 0.000 | -0.933 | 0.000 | 0.672  | 0.047 | 0.938  | 0.000 |
|                                 | HOMA-IR          | -0.986 | 0.000 | -0.968 | 0.000 | 0.793  | 0.011 | -0.902 | 0.001 |
| Blood lipid                     | TC               | -0.889 | 0.001 | -0.893 | 0.001 | 0.843  | 0.004 | -0.885 | 0.002 |
|                                 | TG               | -0.946 | 0.000 | -0.939 | 0.000 | 0.832  | 0.005 | -0.855 | 0.003 |
|                                 | LDL-C            | -0.940 | 0.000 | -0.940 | 0.000 | 0.900  | 0.001 | -0.922 | 0.000 |
|                                 | HDL-C            | 0.939  | 0.000 | 0.947  | 0.000 | -0.845 | 0.004 | 0.933  | 0.000 |
| Liver-<br>related<br>parameters | Liver index      | -0.948 | 0.000 | -0.952 | 0.000 | 0.799  | 0.010 | -0.852 | 0.004 |
|                                 | AST              | -0.865 | 0.003 | -0.841 | 0.004 | 0.716  | 0.030 | -0.857 | 0.003 |
|                                 | ALT              | -0.795 | 0.010 | -0.797 | 0.010 | 0.743  | 0.022 | -0.768 | 0.016 |
|                                 | Hepatic glycogen | 0.902  | 0.001 | 0.925  | 0.000 | -0.947 | 0.000 | 0.856  | 0.003 |
|                                 | TC               | -0.943 | 0.000 | -0.916 | 0.001 | 0.732  | 0.025 | -0.806 | 0.009 |
|                                 | TG               | -0.952 | 0.000 | -0.950 | 0.000 | 0.834  | 0.005 | -0.868 | 0.002 |

**Supplementary Figure Captions:**

**Fig. S1.** The HPGPC chromatogram of AMP.

**Fig. S2.** The ion chromatograms of (A) standard monosaccharides and (B) AMP hydrolysate.

**Fig. S3.** AMP improved the symptoms of T2DM mice. (A-B) Body weight, (C-D) food consumption, and (E-F) water consumption curves of experimental mice were measured throughout the 6-weeks period and at week 6. Data were presented as means  $\pm$  SEM. \*\*\* $P < 0.001$ ; ns, not statistically significant.

**Fig. S4.** The following indicators included (A) ALT and (B) AST in liver of experimental mice were analyzed after AMP administration for 6 weeks. Data were presented as means  $\pm$  SEM. \*  $P < 0.05$ , \*\* $P < 0.01$ , \*\*\* $P < 0.001$ .

**Fig. S1.**

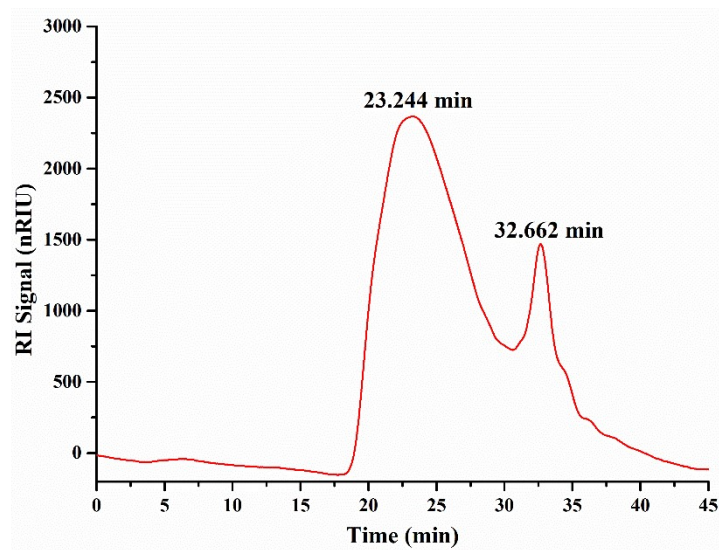

**Fig. S2.**

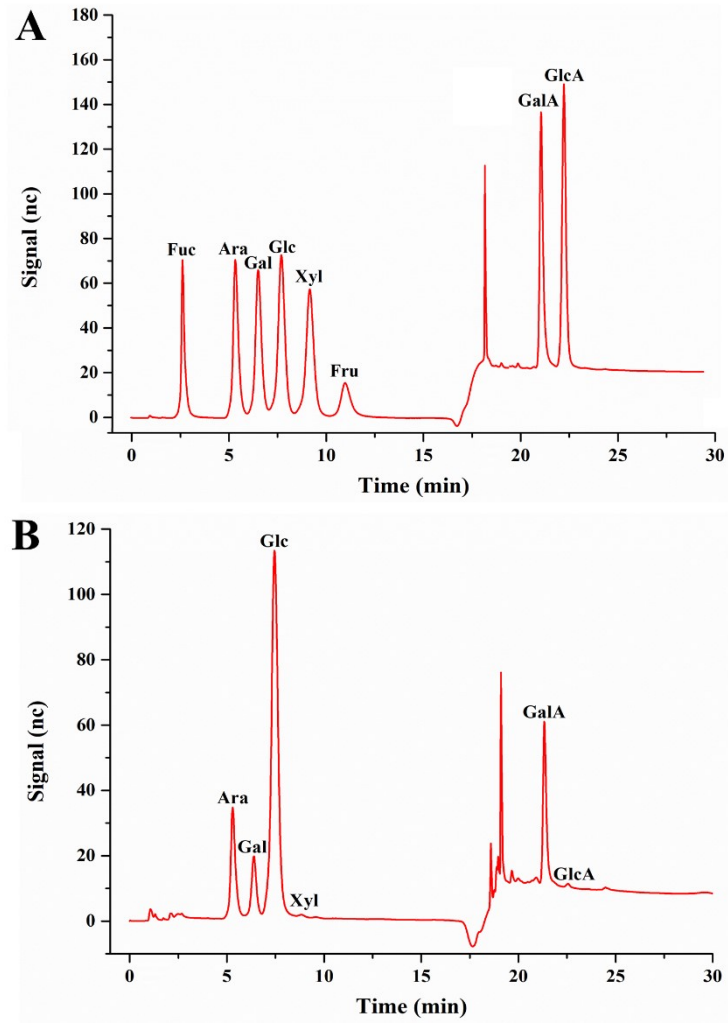

Fig. S3.

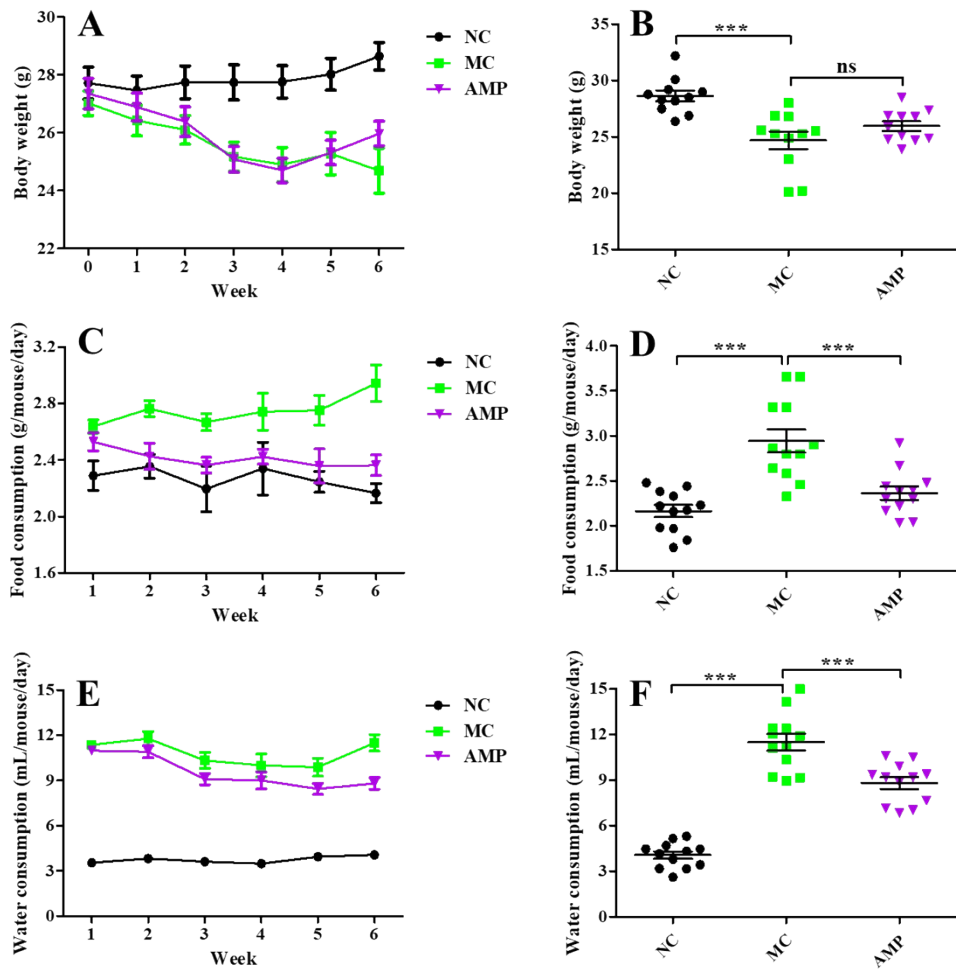

**Fig. S4.**

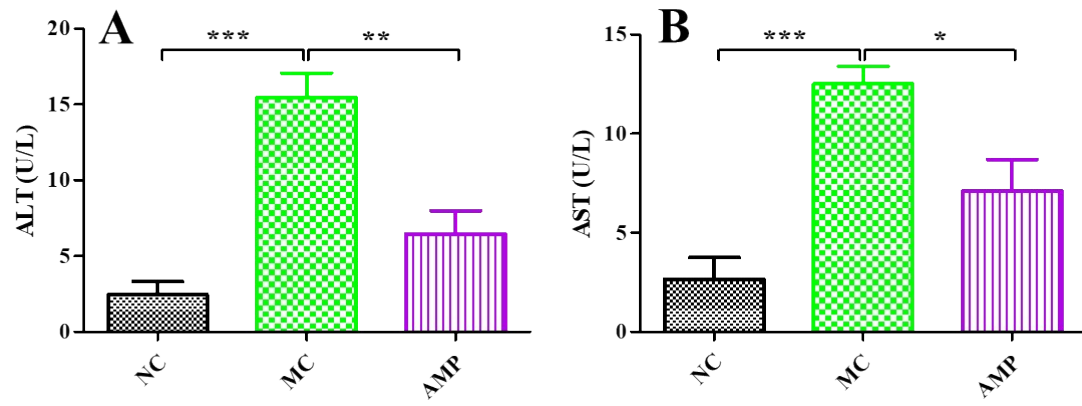

Supplement: d2fo02298b1.pdf [file d2fo02298b1.pdf]
